# Supplementary material for: An ICT infrastructure to integrate clinical and molecular data in oncology research
Source: PubMed Central journal article supplement (PMC3303735; doi:10.1186/1471-2105-13-s4-s5), 2012-03-28
Supplement: 1471-2105-13-S4-S5-S1.pdf [file 1471-2105-13-S4-S5-S1.pdf]

```
<?xml version="1.0" encoding="ISO-8859-1" ?>
<xs:schema xmlns:xs="http://www.w3.org/2001/XMLSchema">

  <xs:element name="document">
    <xs:complexType>
      <xs:sequence>
        <xs:element name="name" type="xs:string"/>
        <xs:element name="date" type="xs:date"/>
        <xs:element name="type" type="xs:string"/>
        <xs:element name="number" type="xs:string"/>
        <xs:element name="analysis" type="analysisValues" minOccurs="0"
          maxOccurs="1"/>
        <xs:element name="grade" type="xs:string"/>
        <xs:element name="state" type="xs:string"/>
        <xs:element name="snomed_codes">
          <xs:complexType>
            <xs:sequence>
              <xs:element name="snomed" type="snomedValues" minOccurs="0"
                maxOccurs="unbounded"/>
            </xs:sequence>
          </xs:complexType>
        </xs:element>
      </xs:sequence>
    </xs:complexType>
  </xs:element>

  <xs:element name="analysisValues">
    <xs:complexType>
      <xs:sequence>
        <xs:element name="estrogens_receptors" type="xs:string"/>
        <xs:element name="progesterone_receptors" type="xs:string"/>
        <xs:element name="Ki67" type="xs:string"/>
        <xs:element name="c-erb_B2" type="xs:string"/>
      </xs:sequence>
    </xs:complexType>
  </xs:element>

  <xs:complexType name="snomedValues">
    <xs:sequence>
      <xs:element name="code1" type="xs:string"/>
      <xs:element name="code2" type="xs:string"/>
      <xs:element name="name1" type="xs:string"/>
      <xs:element name="name2" type="xs:string"/>
    </xs:sequence>
    <xs:attribute name="itemId" type="xs:boolean" />
  </xs:complexType>

</xs:schema>
```
