# Supplementary material for: An ICT infrastructure to integrate clinical and molecular data in oncology research
Source: PubMed Central journal article supplement (PMC3303735; doi:10.1186/1471-2105-13-s4-s5), 2012-03-28
Supplement: 1471-2105-13-S4-S5-S3.pdf [file 1471-2105-13-S4-S5-S3.pdf]

```
<?xml version="1.0" encoding="UTF-8"?>
<document>
  <name>998000637_254080_254090.txt</name>
  <date>08/06/2011</date>
  <type>Istologico</type>
  <number>11-I-03276</number>
  <analysis>
    <estrogens_receptors>90%</estrogens_receptors>
    <progesterone_receptors>70%</progesterone_receptors>
    <Ki67>15%</Ki67>
    <c-erb_B2>3+</c-erb_B2>
  </analysis>
  <grade>G 2</grade>
  <state>pT1bÂ-pN0(sn)Â-pM</state>
  <snomed_codes>
    <snomed consistent="true">
      <code1>T-D8100</code1>
      <code2>M-09410</code2>
      <name1>Axilla structure (body structure)</name1>
      <name2>No evidence of neoplasm (finding)</name2>
    </snomed>
    <snomed consistent="true">
      <code1>T-04000</code1>
      <code2>M-85003</code2>
      <name1>Breast structure (body structure)</name1>
      <name2>Infiltrating duct carcinoma (morphologic abnormality)</name2>
    </snomed>
    <snomed consistent="true">
      <code1>T-04020</code1>
      <code2>M-09410</code2>
      <name1>Right breast structure (body structure)</name1>
      <name2>No evidence of neoplasm (finding)</name2>
    </snomed>
    <snomed consistent="true">
      <code1>T-04000</code1>
      <code2>M-09410</code2>
      <name1>Breast structure (body structure)</name1>
      <name2>No evidence of neoplasm (finding)</name2>
    </snomed>
    <snomed consistent="true">
      <code1>T-04000</code1>
      <code2>M-09410</code2>
      <name1>Breast structure (body structure)</name1>
      <name2>No evidence of neoplasm (finding)</name2>
    </snomed>
    <snomed consistent="true">
      <code1>T-04000</code1>
      <code2>M-09410</code2>
      <name1>Breast structure (body structure)</name1>
      <name2>No evidence of neoplasm (finding)</name2>
    </snomed>
    <snomed consistent="true">
      <code1>T-04000</code1>
      <code2>M-09410</code2>
      <name1>Breast structure (body structure)</name1>
      <name2>No evidence of neoplasm (finding)</name2>
    </snomed>
  </snomed_codes>
</document>
```
